# Supplementary material for: The triple oxygen isotope composition of phytoliths, a new proxy of atmospheric relative humidity: controls of soil water isotope composition, temperature, CO 2 concentration and relative humidity
Source: Copernicus journal article supplement (doi:10.5194/cp-17-1881-2021), 2021-09-23
Supplement: Supplementary file 1 [file cp-17-1881-2021-supplement.zip]

Archive with 2 entries (2 files):
- cp-17-1881-2021-supplement-title-page.pdf
- Revised supplementary material.xlsx
