# Supplementary material for: The triple oxygen isotope composition of phytoliths, a new proxy of atmospheric relative humidity: controls of soil water isotope composition, temperature, CO 2 concentration and relative humidity
Source: Copernicus journal article supplement (doi:10.5194/cp-17-1881-2021), 2021-09-23
Supplement: Supplementary file 1 [file cp-17-1881-2021-supplement.zip › cp-17-1881-2021-supplement-title-page.pdf]

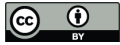

*Supplement of*

**The triple oxygen isotope composition of phytoliths, a new proxy of atmospheric relative humidity: controls of soil water isotope composition, temperature, CO<sub>2</sub> concentration and relative humidity**

**Clément Outrequin et al.**

*Correspondence to:* Anne Alexandre ([alexandre@cerege.fr](mailto:alexandre@cerege.fr))

- [cp-17-1881-2021-supplement-title-page.pdf](#)
- [Revised supplementary material.xlsx](#)

The copyright of individual parts of the supplement might differ from the article licence.
