# Supplementary material for: The triple oxygen isotope composition of phytoliths, a new proxy of atmospheric relative humidity: controls of soil water isotope composition, temperature, CO 2 concentration and relative humidity
Source: Copernicus journal article supplement (doi:10.5194/cp-17-1881-2021), 2021-09-23
Supplement: Supplementary file 1 [file Revised supplementary material.xlsx]

## Sheet: S1
Supplementary material 1: Triple oxygen isotope compositions of water compartments in the soil-plant-atmosphere continuum for the three relative humidity (RH), air temperature (Tair) and CO2 concentration (CO2) treatments (seven climate combinations with 2 to 3 replicates per combination). Final transpiration rates observed from measuring the volume of irrigation water consumed and calculated by …
												Irrigation water (IW)							Fogged water vapor (FW)									Soil water (SW)						Leaf water (LW)			Mean water vapor (v)			Initital water vapor (initial V)			Final vapor (final V)			IW consumption
1Label	Chamber	Container	Growth duration	RH	Tatm	Tleaf	pCO2	VPD	d18OIW	d'18OIW		d17OIW	d'17OIW		17O-excessIW		d18Ofog	d'18Ofog		d17Ofog	d'17Ofog		17O-excessfog		d18OSW	d'18OSW		d17OSW	d'17OSW		17O-excessSW		d'18OLW	d'17OLW	17O-excessLW	d18OV	d'18OV	17O-excessV	d18Oinitial v	d'18Oinitial v	17O-excessinitial v	d18Ofinal v	d'18Ofinal v	17O-excessfinal v	Volume of comsumed IW			Water vapor outflux (Fout)	Final transpiration rate (Tr)
											s.d.			s.d.		s.d.			s.d.			s.d.		s.d.			s.d.			s.d.		s.d.														Av.	s.d.
	#	#	days	%	°C	°C	ppm	kPa	‰	‰	‰	‰	‰	‰	per meg	per meg	‰	‰	‰	‰	‰	‰	per meg	per meg		‰	‰	‰	‰	‰	per meg	per meg	‰	‰	per meg	‰	‰	per meg	‰	‰	per meg	‰	‰	per meg	L			L d-1	L d-1
P2-40-12.07.17	2	2	20	40.1	24	24.13	400	1.77643	6.62363	6.60179	0.04626	3.52527	3.51907	0.031044	33.3213	8.0148	-5.39159	-5.40618	0.00512652	-2.83058	-2.8346	0.011844	19.865	9.01561	6.51576	6.49462	0.0541981	3.45074	3.4448	0.0374731	15.6445	8.93448	16.4456	8.5403	-142.979	-3.96844	-3.97633	-0.644424	-5.10105	-5.1141	5.14801	-2.82891	-2.83292	-6.47306	6.73			3.13927	0.608364
P3-40-12.07.17	3	3	20	40.2	24	24.13	400	1.77347	6.59936	6.57768	0.0307323	3.50876	3.50262	0.0257305	29.5981	9.52251	-5.52168	-5.53698	0.0301666	-2.90382	-2.90804	0.0165838	15.4785	5.05181	6.42902	6.40845	0.0206154	3.40881	3.40301	0.00492706	19.3522	10.9136	16.1101	8.36308	-143.035	-4.37388	-4.38347	9.2241	-5.01124	-5.02384	6.79058	-3.67971	-3.6865	11.8752	4.64			3.1471	0.360918
P4-40-12.07.17	4	4	20	40	24	24.13	400	1.7794	6.54926	6.52791	0.0379728	3.47913	3.47309	0.0439569	26.3492	24.046	-5.36135	-5.37577	0.0252871	-2.81515	-2.81912	0.026613	19.2898	14.7033	6.24746	6.22803	0.0241829	3.30637	3.30092	0.0249152	12.5211	12.6776	17.1091	8.89427	-139.346	-3.62081	-3.62738	2.28718	-4.94462	-4.95688	-5.81744	-2.40601	-2.40891	9.7269	7.771	6.38033	1.59452	3.13144	0.691629
P2-60-12.06.17	2	2	14	59.5	24	22.16	400	1.2011	6.61535	6.59357	0.0432456	3.52161	3.51543	0.0363291	34.0237	15.1096	-5.39159	-5.40618	0.00512652	-2.83058	-2.8346	0.011844	19.865	9.01561	6.58955	6.56793	0.058618	3.49082	3.48475	0.0362238	16.8767	6.63333	13.1962	6.86688	-100.726	-5.03281	-5.04552	7.41197	-5.20627	-5.21987	7.45684	-4.85174	-4.86355	7.36512	2.369			4.65802	0.139695
P3-60-12.06.17	3	3	14	59.8	24	22.16	400	1.1922	6.60166	6.57997	0.00772739	3.50901	3.50287	0.0128917	28.6452	9.90459	-5.52168	-5.53698	0.0301666	-2.90382	-2.90804	0.0165838	15.4785	5.05181	6.37265	6.35243	0.0295965	3.37569	3.37	0.0213259	15.9176	5.72875	13.9299	7.24955	-105.434	-4.94573	-4.958	12.3671	-5.16069	-5.17405	4.7439	-4.66782	-4.67875	22.3628	3.369			4.68151	0.196166
P4-60-12.06.17	4	4	14	59.5	24	22.16	400	1.2011	6.51071	6.4896	0.0149281	3.45648	3.45052	0.0169914	24.0107	11.9673	-5.36135	-5.37577	0.0252871	-2.81515	-2.81912	0.026613	19.2898	14.7033	6.04694	6.02873	0.0166666	3.18999	3.18492	0.0126264	1.74464	4.9296	13.6667	7.12796	-88.0667	-4.78019	-4.79165	4.36314	-5.19761	-5.21116	7.00565	-4.36384	-4.37338	1.72759	4.84	3.526	1.24296	4.65802	0.331708
P2-80-07.08.17	2	2	26	79.1	24	22.58	400	0.619824	6.52814	6.50693	0.0350376	3.47459	3.46857	0.0385404	32.9076	20.402	-5.39159	-5.40618	0.00512652	-2.83058	-2.8346	0.011844	19.865	9.01561		n.a	n.a	n.a	n.a	n.a	n.a	n.a	9.21217	4.83794	-26.0851	-4.77319	-4.78462	2.76702	-5.4874	-5.50251	16.7162	-4.17392	-4.18265	-8.93384	10.655			6.19243	0.676926
P3-80-07.08.17	3	3	26	79	24	22.58	400	0.62279	6.51879	6.49764	0.0293873	3.46198	3.456	0.0192351	25.2449	10.2367	-5.52168	-5.53698	0.0301666	-2.90382	-2.90804	0.0165838	15.4785	5.05181		n.a	n.a	n.a	n.a	n.a	n.a	n.a	12.174	6.38652	-41.3569	-4.90445	-4.91651	7.338	-5.54908	-5.56454	6.8091	-4.35492	-4.36443	7.78885	8.795	9.725	1.31522	6.1846	0.611991
P3-20-400-14.02.18	3	3	14	60.1323	19.9821	20.72	399.705	0.926292	6.47303	6.45217	0.0991356	3.43367	3.42779	0.0580671	21.045	6.34165	-5.67926	-5.69544	0.0695472	-2.98347	-2.98793	0.0544994	19.2634	18	6.25219	6.23273	0.140402	3.31939	3.31389	0.0734829	23.0161	16.5006	17.9397	9.39999	-72.1716	-4.24659	-4.25563	8.49924	-5.28522	-5.29924	1.35464	-3.7273	-3.73427	12.0712	4.54			3.7353	0.494911
P4-20-400-14.02.18	4	4	14	60.1194	19.9894	20.72	399.263	0.927006	6.52939	6.50816	0.00743912	3.45824	3.45227	0.0170284	15.9634	18.1022	-5.65587	-5.67193	0.0157381	-2.99374	-2.99823	0.00779824	-3.45696	5	6.34669	6.32663	0.00375457	3.35132	3.34572	0.0159523	5.25579	16.197	17.1183	8.9603	-78.1847	-4.61331	-4.62399	9.87851	-5.35791	-5.37231	6.08765	-3.77672	-3.78387	14.1371	4.84	4.69	0.212132	3.73608	0.496953
P3-28-400-10.04.18	3	3	11	58.9989	28	23.62	400	1.5391	6.42588	6.40532	0.152411	3.41867	3.41284	0.0870216	30.8298	10.1458	-5.80761	-5.82454	0.0293751	-3.05203	-3.05669	0.0217577	18.6671	13.7636	6.26409	6.24455	0.145501	3.32989	3.32436	0.0851969	27.2377	12.3049	12.5677	6.55547	-80.2769	-5.33281	-5.34708	-0.160278	-5.70243	-5.71875	-2.00723	-4.85997	-4.87181	2.20202	4.99			5.77	0.400798
P4-28-400-10.04.18	4	4	11	59.2711	28	23.62	400	1.52888	6.50208	6.48104	0.0136859	3.43773	3.43183	0.00567937	9.84517	6.98379	-5.79504	-5.81189	0.0695472	-3.04434	-3.04898	0.0544994	19.6988	18	6.28688	6.2672	0.0122648	3.31729	3.3118	0.0122816	2.71829	11.2117	13.1709	6.86538	-88.8464	-5.29297	-5.30703	-5.50617	-5.63913	-5.65509	-6.5377	-4.99213	-5.00464	-4.60967	2.53			5.80007	0.309082
P5-28-400-05.07.18	2	5	14	57.9346	27.7837	23.62	400	1.55933	6.50582	6.48475	0.0274036	3.457	3.45104	0.0240093	27.0879	11.7181	-5.75883	-5.77548	0.0157381	-3.03523	-3.03985	0.00779824	9.60628	5	5.99625	5.97835	0.0205206	3.18396	3.1789	0.0165651	22.3373	10.0814	11.5879	6.00218	-116.208	-4.75931	-4.77067	5.8577	-5.39483	-5.40943	9.13527	-4.11122	-4.1197	2.5157	4.61	4.04333	1.32429	5.6	0.604015
P3-24-200-16.03.18	3	3	14	60.0741	24	19.72	200.326	1.18407	6.48705	6.4661	0.0845758	3.43912	3.43322	0.0313989	19.125	14.1632	-5.80761	-5.82454	0.0695472	-3.05203	-3.05669	0.0544994	18.6671	18	6.3312	6.31124	0.135218	3.36506	3.35941	0.0862025	27.078	14.9835	14.6513	7.64154	-94.3695	-4.40681	-4.41655	21.803	-5.43864	-5.45349	19.7866	-3.21195	-3.21712	24.1382	7.99			4.70297	0.878109
P4-24-200-16.03.18	4	4	14	59.0623	24	19.72	201.25	1.21408	6.49657	6.47556	0.0236465	3.43267	3.4268	0.0147504	7.70041	11.7775	-5.79504	-5.81189	0.0157381	-3.04434	-3.04898	0.00779824	19.6988	5	6.37468	6.35445	0.0304436	3.36576	3.36011	0.0321753	4.9579	18.8719	15.1069	7.88171	-94.7333	-4.81838	-4.83003	17.5572	-5.43721	-5.45204	23.8159	-4.05244	-4.06068	9.81228	4.53	6.26	2.44659	4.62376	0.536529
P3-24-300-30.03.18	3	3	14	60.0133	24	21.74	300	1.18587	6.45534	6.4346	0.105057	3.43244	3.42656	0.0656127	29.0933	10.588	-5.80761	-5.82454	0.0293751	-3.05203	-3.05669	0.0217577	18.6671	13.7636	6.36087	6.34073	0.0843318	3.38659	3.38087	0.0670643	32.9651	22.6094	12.896	6.72833	-80.7368	-4.67929	-4.69027	12.0571	-5.32366	-5.33788	10.0633	-4.14056	-4.14915	13.724	3.33			4.7	0.472078
P4-24-300-30.03.18	4	4	14	58.8609	24	21.74	300	1.22005	6.48777	6.46682	0.0256941	3.42987	3.424	0.0124555	9.51993	15.7287	-5.79504	-5.81189	0.0695472	-3.04434	-3.04898	0.0544994	19.6988	18	6.3477	6.32764	0.012436	3.34888	3.34329	0.0198309	2.29424	13.4584	16.4948	8.60772	-101.531	-4.96178	-4.97413	14.3697	-5.44804	-5.46294	16.8204	-4.49283	-4.50295	10.2206	3.98			4.60799	0.368774
P5-24-300-10.08.18	2	5	15	58.5119	24	21.74	300.048	1.2304	6.48945	6.46848	0.0385241	3.45437	3.44842	0.0252656	33.0614	12.8331	-5.79326	-5.81011	0.0157381	-3.04852	-3.05317	0.00779824	14.5638	5	6.05134	6.03311	0.0119871	3.20818	3.20304	0.00622236	17.5641	3.28706	14.2688	7.44012	-93.787	-5.31154	-5.32569	26.5766	-5.65414	-5.67018	27.2356	-4.67525	-4.68622	27.3154	7.26	4.85667	2.10657	4.58	0.36919
Average										6.501			3.45683		24.2984			-5.63574			-2.95902		16.6491			6.28105			3.33186		15.4676						-4.72359	8.66926	-5.35218				-4.08453	8.72036
s.d.										0.0555702			0.0333847		8.61638			0.18429			0.0982359		5.70985			0.16058			0.0857321		9.84275						0.458399	8.05358	0.218492				0.712866	10.0071
1 Includes the sampling date (with DD.MM.YY)
[truncated: 8 more columns]

## Sheet: S2
Supplementary material 2: Estimation of the triple oxygen isotope composition of bulk leaf water for the three relative humidity (RH), air temperature (Tair) and CO2 concentration (CO2) treatments (seven climate combinations) of the presented growth chamber experiment and the RH treatment of the 2018 growth chamber experiment (Alexandre et al., 2018). Calculations include 2 stages: 1) estimation …
				Climate variables				Physiological data						Irrigation water (IW)								Final atmospheric vapor (Vf)				Final DV												Predicted leaf water (LW) from final DV									Predicted LW-IW
Sample	Chamber	Conainer	RH	Tatm	Tleaf	pCO2	VPD	1 Stomatal cond.	Boundary layer cond.	Irrigation water (IW) d18O	Irrigation water (IW) d17O	Irrigation water (IW) d'18O	Av.	s.d.	Irrigation water (IW) d'17O	17O-excessIW	Av.	s.d.	lIW-MW	Atm. Vapor (V) d18O	Atm. Vapor (V) d17O	Atm. Vapor (V) d'18O	Atm. Vapor (V) d'17O	17O-excessV	d18Ov-d18OIW	d17Ov-d17OIW	17O-excessV-IW	Av.	air vapor pressure- ea	leaf vapor pressure- ei	2wa/wi	ek for d18O	ek for d17O	eequil for d18O at leaf temp	eequil for d17O at leaf temp	3EIW	d18OLW	d17OLW	d'18OLW	Av.	s.d.	d'17OLW	17O-excess LW	Av.	s.d.	d'18OLW - d'18OIW	d'17OLW - d'17OIW	17O-excess LW-IW	d18OLW
			%	°C	°C	ppm	kPa	mol m-2 s-1		‰	‰	‰			‰	per meg				‰	‰	‰	‰	per meg	‰	‰	per meg		kPa	kPa		‰	‰	‰	‰		‰	‰	‰			‰	per meg			‰	‰	per meg	‰
2018 Experiment
P1-40-29-04-16			41.2	25	23	400	1.85088	0.4	2	-5.54635	-2.91214	-5.56179			-2.91639	20.2377			0.524361	-5.54635	-2.91214	-5.56179	-2.91639	20.2377	0	0			1.31003	2.81972	0.464594	26.5	13.6405	9.55166	5.04151	0.2	13.448	6.96422	13.3584			6.94009	-113.164			18.9202	9.85647	-133.401	10.733
P10-40-10-05-16			41.3	25	23	400	1.84773	0.4	2	-5.59443	-2.93257	-5.61014	-5.58596	0.0341851	-2.93688	25.2714	22.7546	3.55933	0.523495	-5.59443	-2.93257	-5.61014	-2.93688	25.2714	0	0			1.31321	2.81972	0.465722	26.5	13.6405	9.55166	5.04151	0.2	13.3751	6.93126	13.2864	13.3224	0.0509312	6.90735	-107.872	-110.518	3.7419	18.8965	9.84423	-133.143	7.59
P10-60-29-04-16			60.5	25	23	400	1.24336	0.4	2	-5.56386	-2.9291	-5.5794			-2.93339	12.5273			0.525755	-5.56386	-2.9291	-5.5794	-2.93339	12.5273	0	0			1.9237	2.81972	0.682232	26.5	13.6405	9.55166	5.04151	0.2	8.79813	4.56718	8.75966			4.55678	-68.3212			14.3391	7.49017	-80.8486	9.581
P2-60-10-05-16			60.2	25	23	400	1.25281	0.4	2	-5.56327	-2.91749	-5.5788			-2.92176	23.8504			0.523725	-5.56327	-2.91749	-5.5788	-2.92176	23.8504	0	0			1.91417	2.81972	0.678849	26.5	13.6405	9.55166	5.04151	0.2	8.87073	4.61586	8.83162			4.60524	-57.8571			14.4104	7.527	-81.7075	11.37
P10-60-20-05-16			60.5	25	23	400	1.24336	0.4	2	-5.56618	-2.92022	-5.58173	-5.57998	0.00154555	-2.9245	22.6548	19.6775	6.22102	0.523941	-5.56618	-2.92022	-5.58173	-2.9245	22.6548	0	0			1.9237	2.81972	0.682232	26.5	13.6405	9.55166	5.04151	0.2	8.79578	4.57611	8.75732	8.78287	0.0422366	4.56567	-58.1938	-61.4574	5.94667	14.3391	7.49017	-80.8486	6.45308
P2-85-29-04-16			80.2	25	23	400	0.623255	0.4	2	-5.59395	-2.9367	-5.60966			-2.94102	20.8836			0.524277	-5.59395	-2.9367	-5.60966	-2.94102	20.8836	0	0			2.5501	2.81972	0.904381	26.5	13.6405	9.55166	5.04151	0.2	4.03967	2.13029	4.03153			2.12802	-0.630244			9.64119	5.06904	-21.5138	2.219
P1-85-10-05-16			76.6	25	23	400	0.736574	0.4	2	-5.54247	-2.89777	-5.55788			-2.90198	32.5835			0.522137	-5.54247	-2.89777	-5.55788	-2.90198	32.5835	0	0			2.43563	2.81972	0.863785	26.5	13.6405	9.55166	5.04151	0.2	4.95569	2.61335	4.94345			2.60994	-0.206267			10.5013	5.51192	-32.7898	2.402
P2-85-20-05-16			81.5	25	23	400	0.582334	0.4	2	-5.56135	-2.89727	-5.57687	-5.58147	0.0261932	-2.90147	43.1145	32.1939	11.1206	0.520269	-5.56135	-2.89727	-5.57687	-2.90147	43.1145	0	0			2.59144	2.81972	0.91904	26.5	13.6405	9.55166	5.04151	0.2	3.76059	2.0096	3.75353	4.24284	0.622466	2.00759	25.7204	8.29463	15.0927	9.33041	4.90906	-17.3941	1.103
Av.													-5.58072		-2.92217		25.9357					-5.58203		25.1404
This experiment
P2-40-12.07.17	2	2	40.1	24	22	400	1.77643	0.5	2	6.62363	3.52527	6.60179			3.51907	33.3214			0.533047	-2.82891	-1.50101	-2.83292	-1.50214	-6.35894	-9.39034	-5.00862	-39.6803		1.20098	2.65351	0.452603	26.2	13.487	9.63583	5.08584	0.2	22.5885	11.7363	22.3372			11.6679	-126.098			15.7354	8.14886	-159.419	16.5816
P3-40-12.07.17	3	3	40.2	24	22	400	1.77347	0.5	2	6.59936	3.50876	6.57768			3.50262	29.5983			0.5325	-3.67971	-1.93268	-3.6865	-1.93455	11.9162	-10.2117	-5.42241	-17.6821		1.20398	2.65351	0.453732	26.2	13.487	9.63583	5.08584	0.2	22.2282	11.5513	21.9848			11.4851	-122.88			15.4071	7.98245	-152.479	16.2405
P4-40-12.07.17	4	4	40	24	22	400	1.7794	0.5	2	6.54926	3.47913	6.52791	0	0.0376753	3.47309	26.3498	29.7565	3.48846	0.532036	-2.40601	-1.26116	-2.40891	-1.26196	9.94616	-8.897	-4.72385	-16.4037	-24.5887	1.19799	2.65351	0.451474	26.2	13.487	9.63583	5.08584	0.2	22.7267	11.8103	22.4723	22.2647	0.251709	11.7411	-124.247	-124.408	1.61479	15.9444	8.26804	-150.597	17.2563
P2-60-12.06.17	2	2	59.5	24	22	400	1.2011	0.4	2	6.61535	3.52161	6.59357			3.51543	34.0241			0.53316	-4.85174	-2.55728	-4.86355	-2.56055	7.40024	-11.3917	-6.05756	-26.6239		1.78201	2.65351	0.671568	26.5	13.6405	9.63583	5.08584	0.2	15.2313	7.93698	15.1164			7.90565	-75.8269			8.52286	4.39022	-109.851	13.2837
P3-60-12.06.17	3	3	59.8	24	22	400	1.1922	0.4	2	6.60166	3.50901	6.57997			3.50287	28.6454			0.532353	-4.66782	-2.44492	-4.67875	-2.44792	22.4634	-11.1956	-5.93311	-6.18192		1.79099	2.65351	0.674954	26.5	13.6405	9.63583	5.08584	0.2	15.2208	7.93828	15.1061			7.90693	-69.0902			8.52614	4.40407	-97.7356	14.0274
P4-60-12.06.17	4	4	59.5	24	22	400	1.2011	0.4	2	6.51071	3.45648	6.4896	6.55438	0.0565088	3.45052	24.0108	28.8934	5.01126	0.5317	-4.36384	-2.30471	-4.37338	-2.30737	1.77436	-10.8042	-5.74135	-22.2364	-18.3474	1.78201	2.65351	0.671568	26.5	13.6405	9.63583	5.08584	0.2	15.4465	8.0429	15.3284	15.1836	0.125471	8.01073	-82.6708	-75.8626	6.79037	8.8388	4.56021	-106.682	13.7605
P2-80-07.08.17	2	2	100	24	22	400	0	0.3	2	6.52814	3.47459	6.50693			3.46857	32.908			0.533057	-4.17392	-2.21487	-4.18265	-2.21732	-8.88324	-10.6327	-5.66976	-41.7912		2.99497	2.65351	1.12869	26.8261	13.8072	9.63583	5.08584	0.2	1.72409	0.960358	1.7226			0.959897	50.3621			-4.78432	-2.50867	17.4541	9.25474
P3-80-07.08.17	3	3	100	24	22	400	0	0.3	2	6.51879	3.46198	6.49764	6.50228	0.00656971	3.456	25.2449	29.0764	5.41865	0.531885	-4.35492	-2.29391	-4.36443	-2.29654	7.87428	-10.8033	-5.73603	-17.3706	-29.5809	2.99497	2.65351	1.12869	26.8261	13.8072	9.63583	5.08584	0.2	1.55821	0.887425	1.557	1.6398	0.117103	0.887032	64.9384	57.6503	10.307	-4.94064	-2.56897	39.6936	12.2484
P3-20-400-14.02.18	3	3	60.1323	19.9821	17.9821	400	0.926292	0.4	2	6.47303	3.43367	6.45217			3.42779	21.0437			0.531261	-3.7273	-1.95763	-3.73427	-1.95955	12.148	-10.1347	-5.37285	-8.89578		1.40951	2.06895	0.681269	26.5	13.6405	9.98305	5.26868	0.2	15.7651	8.21771	15.6421			8.18413	-74.8939			9.18992	4.75634	-95.9376	18.1016
P4-20-400-14.02.18	4	4	60.1194	19.9894	17.9894	400	0.927006	0.4	2	6.52939	3.45824	6.50816	6.48017	0.0395916	3.45227	15.9637	18.5037	3.59211	0.530453	-3.77672	-1.98172	-3.78387	-1.98368	14.2024	-10.2393	-5.42121	-1.76129	-5.32854	1.40984	2.06989	0.681117	26.5	13.6405	9.98241	5.26834	0.2	15.768	8.21787	15.645	15.6436	0.00206582	8.18428	-76.2839	-75.5889	0.982884	9.13685	4.73201	-92.2476	17.2657
P3-28-400-10.04.18	3	3	58.9989	28	26	400	1.5391	0.4	2	6.42588	3.41867	6.40532			3.41284	30.8283			0.532813	-3.21195	-1.67296	-3.21712	-1.67436	24.2833	-9.5763	-5.07428	-6.54503		2.23891	3.37426	0.663527	26.5	13.6405	9.30433	4.91125	0.2	15.9995	8.34745	15.8728			8.3128	-68.0475			9.4675	4.89996	-98.8758	12.647
P4-28-400-10.04.18	4	4	59.2711	28	26	400	1.52888	0.4	2	6.50208	3.43773	6.48104			3.43183	9.84538			0.529519	-4.05244	-2.13189	-4.06068	-2.13417	9.86822	-10.4863	-5.55054	0.0228413		2.24924	3.37426	0.666588	26.5	13.6405	9.30433	4.91125	0.2	15.4936	8.06428	15.3748			8.03194	-85.9715			8.8938	4.60011	-95.8168	13.258
P5-28-400-05.07.18	2	5	57.9346	28	26	400	1.57905	0.4	2	6.50582	3.457	6.48475	6.45704	0.0448228	3.45104	27.0881	22.5873	11.1921	0.532177	-4.78366	-2.50219	-4.79514	-2.50533	26.5063	-11.2165	-5.93866	-0.581741	-2.36798	2.19852	3.37426	0.651558	26.5	13.6405	9.30433	4.91125	0.2	15.5626	8.11234	15.4427	15.5635	0.270059	8.07961	-74.1446	-76.0545	9.11333	8.95796	4.62857	-101.233	11.6553
P3-24-200-16.03.18	3	3	60.0741	24	22	200	1.18407	0.54	2	6.48705	3.43912	6.4661			3.43322	19.1241			0.530958	-4.14056	-2.17457	-4.14915	-2.17694	13.813	-10.5591	-5.59445	-5.31107		1.7992	2.65351	0.678048	26.0866	13.429	9.63583	5.08584	0.2	15.253	7.94956	15.1378			7.91812	-74.6583			8.67175	4.4849	-93.7824	14.7592
P4-24-200-16.03.18	4	4	59.0623	24	22	200	1.21408	0.54	2	6.49657	3.43267	6.47556	6.47083	0.00669335	3.4268	7.70053	13.4123	8.07769	0.529189	-4.49283	-2.36451	-4.50295	-2.36731	10.2511	-10.9185	-5.77735	2.55054	-1.38027	1.7689	2.65351	0.666628	26.0866	13.429	9.63583	5.08584	0.2	15.4081	8.01999	15.2906	15.2142	0.108004	7.988	-85.4258	-80.0421	7.6138	8.81503	4.56121	-93.1264	15.2216
P3-24-300-30.03.18	3	3	60.0133	24	22	300	1.18587	0.47	2	6.45534	3.43244	6.4346			3.42656	29.0927			0.532521	-4.85997	-2.56675	-4.87181	-2.57005	2.2698	-11.2427	-5.97866	-26.8229		1.79738	2.65351	0.677361	26.2874	13.5317	9.63583	5.08584	0.2	14.9177	7.77015	14.8075			7.74012	-78.2675			8.37295	4.31356	-107.36	12.9795
P4-24-300-30.03.18	4	4	58.8609	24	22	300	1.22005	0.47	2	6.48777	3.42987	6.46682			3.424	9.51999			0.529472	-4.99213	-2.6435	-5.00464	-2.647	-4.55495	-11.4059	-6.05261	-14.0749		1.76287	2.65351	0.664354	26.2874	13.5317	9.63583	5.08584	0.2	15.2591	7.93268	15.1439			7.90138	-94.5907			8.67707	4.47738	-104.111	16.6316
P5-24-300-10.08.18	2	5	58.5119	24	22	300	1.2304	0.47	2	6.48945	3.45437	6.46848	6.45663	0.0191019	3.44842	33.0614	23.8914	12.6032	0.533111	-4.11122	-2.17025	-4.1197	-2.17261	2.5911	-10.5323	-5.60526	-30.4703	-23.7894	1.75242	2.65351	0.660416	26.2874	13.5317	9.63583	5.08584	0.2	15.8505	8.25791	15.7262	15.2259	0.4648	8.224	-79.4533	-84.1038	9.10124	9.25775	4.77558	-112.515	14.3711
Av.										24°C Av.		6.54689			3.48602		29.2421			24°C Av.		-3.92389		5.76656												60% RH Av.				1.56714				-79.0158		l=0.517
s.d.																																				460% RH s.d.				0.178659				3.90097
1Stomatal conductance: gs ranges from 0.1 to 0.5 in investigated C3 grasses is lower than 0.2 in C4 grasses. Cf Ocheltree et al., 2012. Here gs is calculated according to Barillot et al., 2010 and Ainsworth et al., 2007
2wa/wi stands for the ratio of water vapor mole fraction in the atmosphere (a) and in the intercellular spaces inside leaves (i)
3EIW stands for the contribution of unevaporated water to the bulk leaf water (two-pool model)
4Average and standard deviation calulated for all experiments conducted at 60% RH.
[truncated: 11 more columns]

## Sheet: S3
Supplementary material 3: Estimation of the triple oxygen isotope composition of phytoliths and phytolith-forming water for the three relative humidity (RH), air temperature (Tair) and CO2 concentration (CO2) treatments (seven climate combinations) of the presented growth chamber experiment and the RH treatment of the 2018 growth chamber experiment (Alexandre et al., 2018). 18aSilica-water after …
d
a)																			l =	0.524
					Climate variables							Observed leaf water (LW)						Silica-water fractionation								Predicted phytolith (Phyto)									Observed phytolith (Phyto)										Observed phytolith-leaf water (Phyto-LW)
Sample	Chamber	Conainer	pCO2	Tatm	Tleaf	Tleaf	RH	VPD	d18OLW	d17OLW	d'18OLW	Av.	s.d.	d'17OLW	17O-excess LW	Av.	s.d.	a18OPhyto-FW	a17OPhyto-FW	1000*Ln18a	1000*Ln17a	17O-excess	d18OPhyto	d17OPhyto	d'18OPhyto	Av.	s.d.	d'17OPhyto	17O-excess Phyto	Av.	s.d.	d18OPhyto	Corr. d17OPhyto	d'18OPhyto	Av.	s.d.	d'17OPhyto	17O-excess Phyto	Av.	s.d.	d'18OPhyto - d'18OLW	Av.	s.d.	d'17OPhyto - d'17OLW	Av.	s.d.	17O-excess Phyto-LW	Av.	s.d.
			ppm	°C	°C	°K	%	kPa	‰	‰	‰			‰	per meg					‰	‰	per meg	‰	‰	‰			‰	per meg			‰		‰			‰	per meg			‰			‰			per meg
2018 Experiment
P1-40-29-04-16				25	23	296.15	41.2	1.85088	10.733	5.51873	10.6758			5.50356	-133.267			1.03198	1.01663	31.4805	16.4958	-125.922	43.0575	22.2431	42.1563			21.9993	-259.189			45.4542	23.3815	44.4515			23.1123	-358.065			33.7757			17.6087			-224.798
P10-40-10-05-16				25	23	296.15	41.3	1.84773	7.59	3.87	7.56134	9.11858	2.20226	3.86253	-129.857	-131.562	2.41126	1.03198	1.01663	31.4805	16.4958	-125.922	39.814	20.567	39.0418	40.5991	2.20226	20.3583	-255.779	-257.484	2.41126	41.947	21.6101	41.0911	42.7713	2.37613	21.3799	-316.239	-337.152	29.5758	33.5298	33.6527	0.173872	17.5173	17.563	0.0646399	-186.381	-205.59	27.1646
P10-60-29-04-16				25	23	296.15	60.5	1.24336	9.581	4.94249	9.53539			4.93032	-104.37			1.03198	1.01663	31.4805	16.4958	-125.922	41.8687	21.6573	41.0159			21.4261	-230.292			39.426	20.366	38.6686			20.1614	-255.689			29.1332			15.231			-151.319
P2-60-10-05-16				25	23	296.15	60.2	1.25281	11.37	5.832	11.3058			5.81506	-154.428			1.03198	1.01663	31.4805	16.4958	-125.922	43.7149	22.5616	42.7863			22.3108	-280.35			37.8825	19.5991	37.1826			19.4095	-222.953			25.8768			13.5944			-68.5252
P10-60-20-05-16				25	23	296.15	60.5	1.24336	6.45308	3.32338	6.43235	9.0912	2.46693	3.31787	-78.4116	-116.42	53.7515	1.03198	1.01663	31.4805	16.4958	-125.922	38.6407	20.0112	37.9128	40.5717	2.46693	19.8136	-204.334	-238.325	38.6395	37.368	19.3261	36.6868	37.5127	1.03134	19.1417	-228.936	-235.859	17.4316	30.2544	28.4215	2.27397	15.8238	14.8831	1.15471	-150.524	-123.456	47.5732
P2-85-29-04-16				25	23	296.15	80.2	0.623255	2.219	1.12709	2.21654			1.12645	-43.8797			1.03198	1.01663	31.4805	16.4958	-125.922	34.2712	17.7784	33.697			17.6222	-169.802			30.7177	15.9401	30.2554			15.8144	-160.462			28.0388			14.6879			-116.582
P1-85-10-05-16				25	23	296.15	76.6	0.736574	2.402	1.238	2.39912			1.23723	-29.5009			1.03198	1.01663	31.4805	16.4958	-125.922	34.4601	17.8912	33.8796			17.733	-155.423			31.1507	16.1695	30.6754			16.0401	-156.475			28.2763			14.8029			-126.975
P2-85-20-05-16				25	23	296.15	81.5	0.582334	1.103	0.528	1.10239	1.90602	0.701922	0.527861	-54.2024	-41.8517	17.4666	1.03198	1.01663	31.4805	16.4958	-125.922	33.1195	17.1694	32.5829	33.3865	0.701922	17.0236	-180.124	-168.45	12.4061	30.218	15.6621	29.7705	30.2337	0.452858	15.5407	-178.134	-165.024	11.5274	28.6681	28.3277	0.31776	15.0128	14.8345	0.16474	-123.932	-122.496	5.34294
This experiment
P2-40-12.07.17	2	2	400	24	22	295.15	40.1	1.77643	16.5816	8.57687	16.4456			8.5403	-142.979			1.03217	1.01673	31.6655	16.5927	-126.662	49.2872	25.4515	48.1111			25.133	-269.64			51.3198	26.4155	50.0463			26.0726	-351.825			33.6007			17.5323			-208.846
P3-40-12.07.17	3	3	400	24	22	295.15	40.2	1.77347	16.2405	8.39814	16.1101			8.36308	-143.035			1.03217	1.01673	31.6655	16.5927	-126.662	48.9352	25.2698	47.7755			24.9558	-269.697			49.5268	25.5326	48.3394			25.212	-311.171			32.2294			16.849			-168.135
P4-40-12.07.17	4	4	400	24	22	295.15	40	1.7794	17.2563	8.93394	17.1091	16.5549	0.508421	8.89427	-139.346	-141.787	2.11357	1.03217	1.01673	31.6655	16.5927	-126.662	49.9836	25.8145	48.7746	48.2204	0.508421	25.487	-266.008	-268.449	2.11357	48.4981	24.9676	47.3587	48.5815	1.36005	24.661	-344.373	-335.79	21.6438	30.2496	32.0266	1.68473	15.7668	16.716	0.890259	-205.027	-194.003	22.4831
P2-60-12.06.17	2	2	400	24	22	295.15	59.5	1.2011	13.2837	6.89051	13.1962			6.86688	-100.726			1.03217	1.01673	31.6655	16.5927	-126.662	45.8832	23.7369	44.8617			23.4596	-227.388			40.3698	20.8466	39.5762			20.6322	-264.022			26.38			13.7654			-163.296
P3-60-12.06.17	3	3	400	24	22	295.15	59.8	1.1922	14.0274	7.27589	13.9299			7.24955	-105.434			1.03217	1.01673	31.6655	16.5927	-126.662	46.6508	24.1288	45.5954			23.8423	-232.095			41.8203	21.6041	40.9695			21.374	-257.899			27.0396			14.1244			-152.466
P4-60-12.06.17	4	4	400	24	22	295.15	59.5	1.2011	13.7605	7.15342	13.6667	13.5976	0.371682	7.12796	-88.0667	-98.0755	8.98174	1.03217	1.01673	31.6655	16.5927	-126.662	46.3754	24.0042	45.3322	45.2631	0.371682	23.7207	-214.729	-224.737	8.98174	41.3991	21.3763	40.5651	40.3703	0.71677	21.151	-267.365	-263.095	4.80051	26.8984	26.7727	0.347307	14.0231	13.971	0.185131	-179.298	-165.02	13.4992
P2-80-07.08.17	2	2	400	24	22	295.15	79.1	0.619824	9.25474	4.84966	9.21217			4.83794	-26.0851			1.03217	1.01673	31.6655	16.5927	-126.662	41.7246	21.6619	40.8776			21.4306	-152.747			36.4648	18.9119	35.8157			18.7353	-175.368			26.6035			13.8974			-149.283
P3-80-07.08.17	3	3	400	24	22	295.15	79	0.62279	12.2484	6.40696	12.174	10.6931	2.09434	6.38652	-41.3569			1.03217	1.01673	31.6655	16.5927	-126.662	44.8146	23.2453	43.8395	42.3586	2.09434	22.9792	-168.019	-160.383	10.7988	36.7748	19.0694	36.1148	35.9652	0.211459	18.8899	-178.701	-177.034	2.35686	23.9407	25.2721	1.88288	12.5034	13.2004	0.985718	-137.344	-143.313	8.44191
P3-20-400-14.02.18	3	3	400	19.9821	17.9821	291.132	60.1323	0.926292	18.1016	9.44431	17.9397			9.39999	-72.1716			1.03296	1.01714	32.428	16.9922	-129.712	51.6577	26.7436	50.3677			26.3922	-201.883			41.3576	21.3619	40.5252			21.137	-260.348			22.5855			11.737			-188.176
P4-20-400-14.02.18	4	4	400	19.9894	17.9894	291.139	60.1194	0.927006	17.2657	9.00056	17.1183	17.529	0.58079	8.9603	-78.1847			1.03296	1.01714	32.4266	16.9915	-129.706	50.7928	26.2915	49.5449	49.9563	0.581781	25.9518	-207.891	-204.887	4.24793	42.5938	22.0034	41.7117	41.1184	0.838946	21.7649	-258.906	-259.627	1.01904	24.5933	23.5894	1.41974	12.8046	12.2708	0.754891	-180.722	-184.449	5.27093
P3-28-400-10.04.18	3	3	400	28	26	299.15	58.9989	1.5391	12.647	6.577	12.5677			6.55547	-80.2769			1.03142	1.01634	30.9367	16.2108	-123.747	44.4646	23.0274	43.5044			22.7663	-204.024			39.6091	20.468	38.8448			20.2613	-248.755			26.2771			13.7058			-168.478
P4-28-400-10.04.18	4	4	400	28	26	299.15	59.2711	1.52888	13.258	6.889	13.1709			6.86538	-88.8464			1.03142	1.01634	30.9367	16.2108	-123.747	45.0948	23.3445	44.1076			23.0762	-212.593			40.5921	20.9677	39.7899			20.7509	-258.192			26.619			13.8855			-169.345
P5-28-400-05.07.18	2	5	400	27.7837	25.7837	298.934	57.9346	1.55933	11.6553	6.02023	11.5879	12.4421	0.798942	6.00218	-116.208	-95.1106	18.767	1.03146	1.01636	30.9753	16.2311	-123.901	43.482	22.4823	42.5632	43.3917	0.778313	22.2333	-240.11	-218.909	18.854	39.4239	20.3693	38.6667	39.1005	0.603684	20.1646	-251.374	-252.774	4.87165	27.0788	26.6583	0.402273	14.1624	13.9179	0.230016	-135.166	-157.663	19.4879
P3-24-200-16.03.18	3	3	200	24	22	295.15	60.0741	1.18407	14.7592	7.67081	14.6513			7.64154	-94.3695			1.03217	1.01673	31.6655	16.5927	-126.662	47.4062	24.5303	46.3168			24.2342	-221.031			40.9232	21.1555	40.108			20.9349	-242.172			25.4567			13.2933			-147.802
P4-24-200-16.03.18	4	4	200	24	22	295.15	59.0623	1.21408	15.2216	7.91285	15.1069	14.8791	0.322124	7.88171	-94.7333			1.03217	1.01673	31.6655	16.5927	-126.662	47.8834	24.7764	46.7724	46.5446	0.322124	24.4744	-221.395	-221.213	0.257192	42.2256	21.8277	41.3584	40.7332	0.884165	21.5929	-244.381	-243.276	1.56174	26.2515	25.8541	0.56204	13.7112	13.5022	0.295453	-149.647	-148.725	1.30454
P3-24-300-30.03.18	3	3	300	24	22	295.15	60.0133	1.18587	12.9795	6.75102	12.896			6.72833	-80.7368			1.03217	1.01673	31.6655	16.5927	-126.662	45.5692	23.5951	44.5614			23.321	-207.399			40.1554	20.7626	39.3702			20.55	-237.486			26.4742			13.8216			-156.75
P4-24-300-30.03.18	4	4	300	24	22	295.15	58.8609	1.22005	16.6316	8.64487	16.4948			8.60772	-101.531			1.03217	1.01673	31.6655	16.5927	-126.662	49.3388	25.5206	48.1603			25.2004	-228.193			41.4596	21.4306	40.6232			21.2041	-244.925			24.1284			12.5964			-143.394
P5-24-300-10.08.18	2	5	300	24	22	295.15	58.5119	1.2304	14.3711	7.46787	14.2688	14.5532	1.81619	7.44012	-93.787	-92.0184	10.5095	1.03217	1.01673	31.6655	16.5927	-126.662	47.0056	24.3239	45.9342	46.2186	1.81619	24.0328	-220.449	-218.68	10.5095	41.4596	21.4306	40.6232	40.2055	0.723462	21.2041	-244.925	-242.446	4.29485	26.3545	25.6524	1.32111	13.764	13.394	0.691341	-151.138	-150.427	6.70615
160% RH Av.												13.868				-95.0681										45.3545				-220.885					40.1024				-250.398			26.2344			13.6963			-155.459
s.d.												1.09514				3.02878										1.41703				2.81155					0.703376				9.6752			0.56357			0.290737			7.4596
1Average and standard deviation calulated for all experiments conducted at 60% RH.
b)																			l =	0.522
					Climate variables							Observed leaf water (LW)						Silica-water fractionation								Predicted phytolith (Phyto)									Observed phytolith (Phyto)										Observed phytolith-leaf water (Phyto-LW)
Sample	Chamber	Conainer	pCO2	Tatm	Tleaf	Tleaf	RH	VPD	d18OLW	d17OLW	d'18OLW	Av.	s.d.	d'17OLW	17O-excess LW	Av.	s.d.	a18OPhyto-FW	a17OPhyto-FW	1000*Ln18a	1000*Ln17a	17O-excess	d18OPhyto	d17OPhyto	d'18OPhyto	Av.	s.d.	d'17OPhyto	17O-excess Phyto	Av.	s.d.	d18OPhyto	Corr. d17OPhyto	d'18OPhyto	Av.	s.d.	d'17OPhyto	17O-excess Phyto	Av.	s.d.	d'18OPhyto - d'18OLW	Av.	s.d.	d'17OPhyto - d'17OLW	Av.	s.d.	17O-excess Phyto-LW	Av.	s.d.
			ppm	°C	°C	°K	%	kPa	‰	‰	‰			‰	per meg					‰	‰	per meg	‰	‰	‰			‰	per meg			‰		‰			‰	per meg			‰			‰			per meg
2018 Experiment
P1-40-29-04-16				25	23	296.15	41.2	1.85088	10.733	5.51873	10.6758			5.50356	-133.267			1.03198	1.01657	31.4805	16.4328	-188.883	43.0575	22.1788	42.1563			21.9364	-322.15			45.4542	23.3815	44.4515			23.1123	-358.065			33.7757			17.6087			-224.798
P10-40-10-05-16				25	23	296.15	41.3	1.84773	7.59	3.87	7.56134	9.11858	2.20226	3.86253	-129.857	-131.562	2.41126	1.03198	1.01657	31.4805	16.4328	-188.883	39.814	20.5027	39.0418	40.5991	2.20226	20.2954	-318.74	-320.445	2.41126	41.947	21.6101	41.0911	42.7713	2.37613	21.3799	-316.239	-337.152	29.5758	33.5298	33.6527	0.173872	17.5173	17.563	0.0646399	-186.381	-205.59	27.1646
P10-60-29-04-16				25	23	296.15	60.5	1.24336	9.581	4.94249	9.53539			4.93032	-104.37			1.03198	1.01657	31.4805	16.4328	-188.883	41.8687	21.593	41.0159			21.3631	-293.253			39.426	20.366	38.6686			20.1614	-255.689			29.1332			15.231			-151.319
P2-60-10-05-16				25	23	296.15	60.2	1.25281	11.37	5.832	11.3058			5.81506	-154.428			1.03198	1.01657	31.4805	16.4328	-188.883	43.7149	22.4972	42.7863			22.2479	-343.311			37.8825	19.5991	37.1826			19.4095	-222.953			25.8768			13.5944			-68.5252
P10-60-20-05-16				25	23	296.15	60.5	1.24336	6.45308	3.32338	6.43235	9.0912	2.46693	3.31787	-78.4116	-112.403	38.6395	1.03198	1.01657	31.4805	16.4328	-188.883	38.6407	19.947	37.9128	40.5717	2.46693	19.7507	-267.295	-301.286	38.6395	37.368	19.3261	36.6868	37.5127	1.03134	19.1417	-228.936	-235.859	17.4316	30.2544	28.4215	2.27397	15.8238	14.8831	1.15471	-150.524	-123.456	47.5732
P2-85-29-04-16				25	23	296.15	80.2	0.623255	2.219	1.12709	2.21654			1.12645	-43.8797			1.03198	1.01657	31.4805	16.4328	-188.883	34.2712	17.7143	33.697			17.5593	-232.763			30.7177	15.9401	30.2554			15.8144	-160.462			28.0388			14.6879			-116.582
P1-85-10-05-16				25	23	296.15	76.6	0.736574	2.402	1.238	2.39912			1.23723	-29.5009			1.03198	1.01657	31.4805	16.4328	-188.883	34.4601	17.8271	33.8796			17.6701	-218.384			31.1507	16.1695	30.6754			16.0401	-156.475			28.2763			14.8029			-126.975
P2-85-20-05-16				25	23	296.15	81.5	0.582334	1.103	0.528	1.10239	1.90602	0.701922	0.527861	-54.2024	-42.5277	12.4061	1.03198	1.01657	31.4805	16.4328	-188.883	33.1195	17.1053	32.5829	33.3865	0.701922	16.9607	-243.085	-231.411	12.4061	30.218	15.6621	29.7705	30.2337	0.452858	15.5407	-178.134	-165.024	11.5274	28.6681	28.3277	0.31776	15.0128	14.8345	0.16474	-123.932	-122.496	5.34294
This experiment
P2-40-12.07.17	2	2	400	24	22	295.15	40.1	1.77643	16.5816	8.57687	16.4456			8.5403	-142.979			1.03217	1.01667	31.6655	16.5294	-189.993	49.2872	25.3866	48.1111			25.0697	-332.971			51.3198	26.4155	50.0463			26.0726	-351.825			33.6007			17.5323			-208.846
P3-40-12.07.17	3	3	400	24	22	295.15	40.2	1.77347	16.2405	8.39814	16.1101			8.36308	-143.035			1.03217	1.01667	31.6655	16.5294	-189.993	48.9352	25.2049	47.7755			24.8924	-333.028			49.5268	25.5326	48.3394			25.212	-311.171			32.2294			16.849			-168.135
P4-40-12.07.17	4	4	400	24	22	295.15	40	1.7794	17.2563	8.93394	17.1091	16.5549	0.508421	8.89427	-139.346	-141.787	2.11357	1.03217	1.01667	31.6655	16.5294	-189.993	49.9836	25.7496	48.7746	48.2204	0.508421	25.4236	-329.339	-331.78	2.11357	48.4981	24.9676	47.3587	48.5815	1.36005	24.661	-344.373	-335.79	21.6438	30.2496	32.0266	1.68473	15.7668	16.716	0.890259	-205.027	-194.003	22.4831
P2-60-12.06.17	2	2	400	24	22	295.15	59.5	1.2011	13.2837	6.89051	13.1962			6.86688	-100.726			1.03217	1.01667	31.6655	16.5294	-189.993	45.8832	23.6721	44.8617			23.3963	-290.719			40.3698	20.8466	39.5762			20.6322	-264.022			26.38			13.7654			-163.296
P3-60-12.06.17	3	3	400	24	22	295.15	59.8	1.1922	14.0274	7.27589	13.9299			7.24955	-105.434			1.03217	1.01667	31.6655	16.5294	-189.993	46.6508	24.0639	45.5954			23.7789	-295.426			41.8203	21.6041	40.9695			21.374	-257.899			27.0396			14.1244			-152.466
P4-60-12.06.17	4	4	400	24	22	295.15	59.5	1.2011	13.7605	7.15342	13.6667	13.5976	0.371682	7.12796	-88.0667	-98.0755	8.98174	1.03217	1.01667	31.6655	16.5294	-189.993	46.3754	23.9394	45.3322	45.2631	0.371682	23.6573	-278.059	-288.068	8.98174	41.3991	21.3763	40.5651	40.3703	0.71677	21.151	-267.365	-263.095	4.80051	26.8984	26.7727	0.347307	14.0231	13.971	0.185131	-179.298	-165.02	13.4992
P2-80-07.08.17	2	2	400	24	22	295.15	79.1	0.619824	9.25474	4.84966	9.21217			4.83794	-26.0851			1.03217	1.01667	31.6655	16.5294	-189.993	41.7246	21.5972	40.8776			21.3673	-216.078			36.4648	18.9119	35.8157			18.7353	-175.368			26.6035			13.8974			-149.283
P3-80-07.08.17	3	3	400	24	22	295.15	79	0.62279	12.2484	6.40696	12.174	10.6931	2.09434	6.38652	-41.3569	-33.721	10.7988	1.03217	1.01667	31.6655	16.5294	-189.993	44.8146	23.1805	43.8395	42.3586	2.09434	22.9159	-231.35	-223.714	10.7988	36.7748	19.0694	36.1148	35.9652	0.211459	18.8899	-178.701	-177.034	2.35686	23.9407	25.2721	1.88288	12.5034	13.2004	0.985718	-137.344	-143.313	8.44191
P3-20-400-14.02.18	3	3	400	19.9821	17.9821	291.132	60.1323	0.926292	18.1016	9.44431	17.9397			9.39999	-72.1716			1.03296	1.01707	32.428	16.9274	-194.568	51.6577	26.677	50.3677			26.3274	-266.739			41.3576	21.3619	40.5252			21.137	-260.348			22.5855			11.737			-188.176
P4-20-400-14.02.18	4	4	400	19.9894	17.9894	291.139	60.1194	0.927006	17.2657	9.00056	17.1183	17.529	0.58079	8.9603	-78.1847	-75.1781	4.25189	1.03296	1.01707	32.4266	16.9267	-194.559	50.7928	26.2249	49.5449	49.9563	0.581781	25.887	-272.744	-269.742	4.24594	42.5938	22.0034	41.7117	41.1184	0.838946	21.7649	-258.906	-259.627	1.01904	24.5933	23.5894	1.41974	12.8046	12.2708	0.754891	-180.722	-184.449	5.27093
P3-28-400-10.04.18	3	3	400	28	26	299.15	58.9989	1.5391	12.647	6.577	12.5677			6.55547	-80.2769			1.03142	1.01628	30.9367	16.1489	-185.62	44.4646	22.9641	43.5044			22.7044	-265.897			39.6091	20.468	38.8448			20.2613	-248.755			26.2771			13.7058			-168.478
P4-28-400-10.04.18	4	4	400	28	26	299.15	59.2711	1.52888	13.258	6.889	13.1709			6.86538	-88.8464			1.03142	1.01628	30.9367	16.1489	-185.62	45.0948	23.2812	44.1076			23.0143	-274.466			40.5921	20.9677	39.7899			20.7509	-258.192			26.619			13.8855			-169.345
P5-28-400-05.07.18	2	5	400	27.7837	25.7837	298.934	57.9346	1.55933	11.6553	6.02023	11.5879	12.4421	0.798942	6.00218	-116.208	-95.1106	18.767	1.03146	1.0163	30.9753	16.1691	-185.852	43.482	22.4189	42.5632	43.3917	0.778313	22.1713	-302.061	-280.808	18.8974	39.4239	20.3693	38.6667	39.1005	0.603684	20.1646	-251.374	-252.774	4.87165	27.0788	26.6583	0.402273	14.1624	13.9179	0.230016	-135.166	-157.663	19.4879
P3-24-200-16.03.18	3	3	200	24	22	295.15	60.0741	1.18407	14.7592	7.67081	14.6513			7.64154	-94.3695			1.03217	1.01667	31.6655	16.5294	-189.993	47.4062	24.4654	46.3168			24.1709	-284.362			40.9232	21.1555	40.108			20.9349	-242.172			25.4567			13.2933			-147.802
P4-24-200-16.03.18	4	4	200	24	22	295.15	59.0623	1.21408	15.2216	7.91285	15.1069	14.8791	0.322124	7.88171	-94.7333	-94.5514	0.257192	1.03217	1.01667	31.6655	16.5294	-189.993	47.8834	24.7115	46.7724	46.5446	0.322124	24.4111	-284.726	-284.544	0.257192	42.2256	21.8277	41.3584	40.7332	0.884165	21.5929	-244.381	-243.276	1.56174	26.2515	25.8541	0.56204	13.7112	13.5022	0.295453	-149.647	-148.725	1.30454
P3-24-300-30.03.18	3	3	300	24	22	295.15	60.0133	1.18587	12.9795	6.75102	12.896			6.72833	-80.7368			1.03217	1.01667	31.6655	16.5294	-189.993	45.5692	23.5303	44.5614			23.2577	-270.73			40.1554	20.7626	39.3702			20.55	-237.486			26.4742			13.8216			-156.75
P4-24-300-30.03.18	4	4	300	24	22	295.15	58.8609	1.22005	16.6316	8.64487	16.4948			8.60772	-101.531			1.03217	1.01667	31.6655	16.5294	-189.993	49.3388	25.4557	48.1603			25.1371	-291.524			41.4596	21.4306	40.6232			21.2041	-244.925			24.1284			12.5964			-143.394
P5-24-300-10.08.18	2	5	300	24	22	295.15	58.5119	1.2304	14.3711	7.46787	14.2688	14.5532	1.81619	7.44012	-93.787	-92.0184	10.5095	1.03217	1.01667	31.6655	16.5294	-189.993	47.0056	24.2591	45.9342	46.2186	1.81619	23.9695	-283.78	-282.011	10.5095	41.4596	21.4306	40.6232	40.2055	0.723462	21.2041	-244.925	-242.446	4.29485	26.3545	25.6524	1.32111	13.764	13.394	0.691341	-151.138	-150.427	6.70615
160% RH Av.												13.868				-94.9389										45.3545				-283.858					40.1024				-250.398			26.2344			13.6963			-155.459
s.d.												1.09514				2.48645										1.41703				3.20991					0.703376				9.6752			0.56357			0.290737			7.4596
1Average and standard deviation calulated for all experiments conducted at 60% RH.
[truncated: 22 more columns]
